# Supplementary material for: ZnO/ITO core/shell nanostructure electrodes for future prototype solar cell devices
Source: Royal Society of Chemistry journal article supplement (doi:10.1039/c4ra12581a), 2014-12-03

## Supporting Information

### **ZnO/ITO core/shell nanostructure electrodes for future prototype solar cell devices**

Mudusu Devika,<sup>1,2</sup> Nandanapalli Koteeswara Reddy,<sup>1,3,#,\*</sup> and Charles W. Tu<sup>1,4,\*</sup>

<sup>1</sup>Department of Nanobio Materials and Electronics, Gwangju Institute of Science and Technology, Gwangju 500712, Republic of Korea

<sup>2</sup>Department of Aerospace Engineering, Indian Institute of Science, Bangalore 560012, India

<sup>3</sup>Center for Nanoscience and Engineering, Indian Institute of Science, Bangalore 560012, India

<sup>4</sup>Department of Electrical and Computer Engineering, University of California, San Diego, La Jolla, CA 92093-0407, USA

\*Corr. authors: E-mail: dr\_nkreddy@rediffmail.com (NKR) and ctu@soe.ucsd.edu (CWT)

#Present address: Institute of Chemistry, Humboldt University, Brook-Taylor-Str. 2, 12489 Berlin, Germany.

#### **SI-1: Few details about the future prototype PV device using hierarchical hetero nanostructures.**

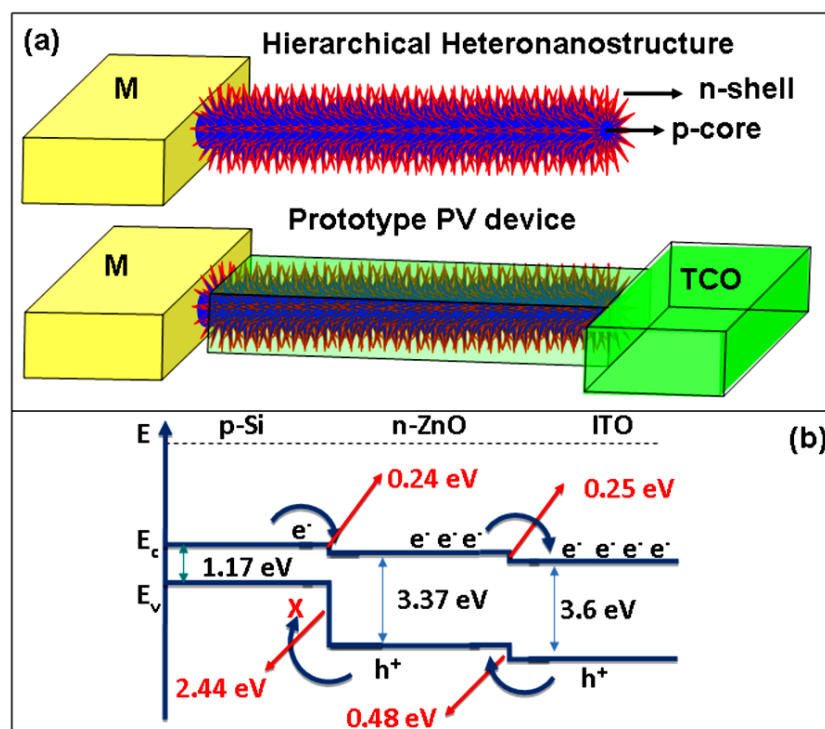

**Figure S1:** (a) Schematic representation of future prototype photovoltaic device will be fabricated using a single hierarchical heteronanostructure. (b) Energy band diagram of hierarchical heteronanostructure with TCOE (For example, ZnO-branches with ITO-TCO layers on p-Si NW).

### SI-2: Fabrication of ZnO/ITO NRs based device.

ZnO/ITO NRs annealed at 500 °C was used for the fabrication of diode. Here the device was fabricated in two steps using a bilayer photolithographic mask, explained below:

**Step-1:** i) ZnO/ITO core/shell nanostructures dispersed in ethanol solution was doped on SiO<sub>2</sub>/Si substrate and then dried with nitrogen gas.

ii) Spin coated the photo resist (AZ1512) and baked at 110 °C for 1 min 30 s.

iii) Pattern of mask 1 was exposed and then developed by immersing in MIF 500 solution for 25 s then cleaned with deionized water. Then, the structures were dipped for a few seconds in ITO etchant (mixture of HCl+HNO<sub>3</sub>+H<sub>2</sub>O) to etch 50 nm ITO layer and followed by DIW.

iv) Ni/Au layers (100/50 nm) were deposited at room temperature by e-beam evaporation and then, photo resist was lifted off.

**Step-2:** Similar steps were followed for second contacts (Au~200 nm) using mask 2.

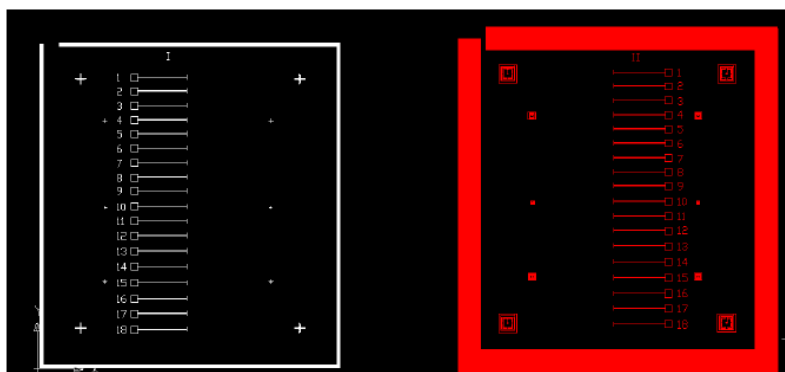

**Figure S2:** Images of bilayer photolithography mask 1 (left) and mask 2 (right)

**SI-3:** Elaborated XRD plots (between 49 and 53°) of as-grown and annealed ZnO/ITO core/shell structures.

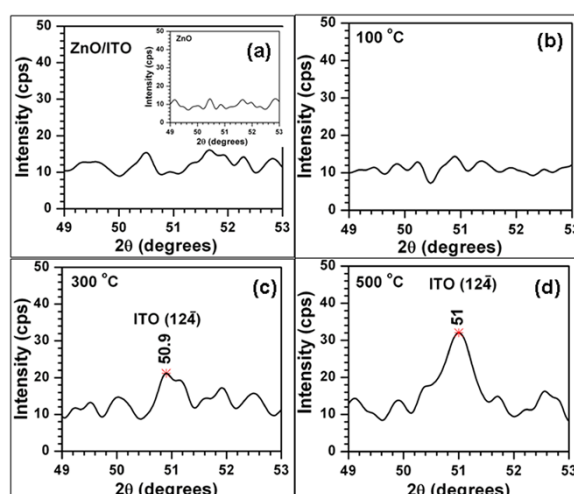

**Figure S3:** The elaborated XRD plots of (a) as-grown ZnO/ITO (inset shows the XRD plot of as-grown ZnO NRs), and (b-d) annealed at 100, 300, and 500 °C, respectively.

**SI-4:** FWHM and lattice constant 'c' values of ZnO, and ZnO/ITO structures.

| Structure<br>s | Peak position<br>(2 $\theta^\circ$ ) | FWHM<br>(2 $\theta^\circ$ ) | Lattice constant<br>'c nm' |
|----------------|--------------------------------------|-----------------------------|----------------------------|
| ZnO            | 34.34                                | 0.250                       | 0.522                      |
| ZnO/ITO        | 34.33                                | 0.545                       | 0.522                      |
| 100 °C         | 34.31                                | 0.598                       | 0.521                      |
| 300 °C         | 34.32                                | 0.474                       | 0.522                      |
| 700 °C         | 34.34                                | 0.419                       | 0.522                      |

**SI-5:** HRTEM images of as-grown ZnO/ITO core/shell structures.

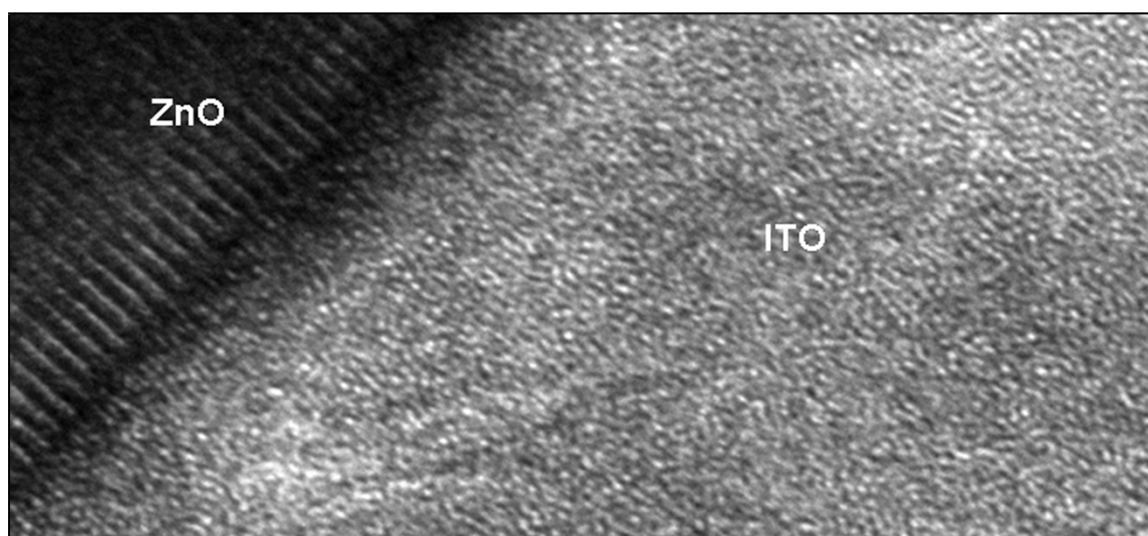

Figure shows the well-crystallized ZnO NR and amorphous ITO nanostructures.

**SI-6:** Schematic representation of energy level band diagram of ZnO with its impurity levels [x, y].

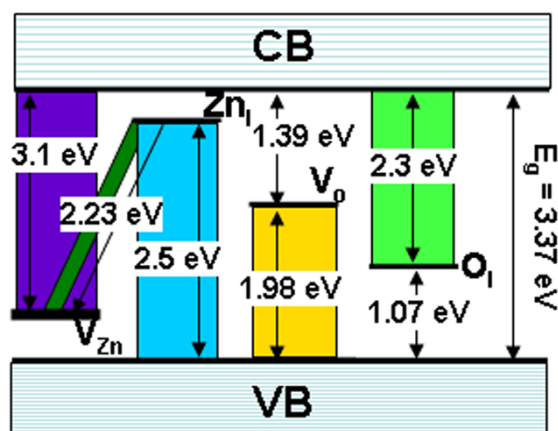

[x] A. Urbieto, P. Fernandez, and J. Piqueras, J. Appl. Phys., Vol. 96, 2004, 2210.

[y] A. Urbieto, P. Fernandez, and J. Piqueras, Appl. Phys. Lett., Vol. 85, 59687, 2004.

**SI-7:** (a) Elaborated PL spectra of ZnO/ITO core/shell nanostructures, the elaborated PL peak exhibited at 593 nm is shown in (b).

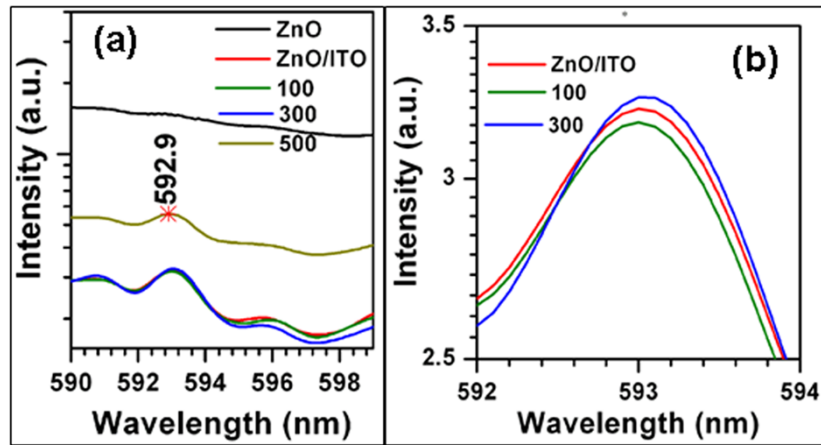

Supplement: c4ra12581a1.pdf [file c4ra12581a1.pdf]
